# Supplementary material for: Standardized packaging and illicit tobacco use: A systematic review
Source: PubMed Central journal article supplement — Tob Prev Cessat. 2017 May 2;3:13. doi: 10.18332/tpc/70277 (PMC7232822; doi:10.18332/tpc/70277), 2017-05-02
Supplement: TPC-3-13-s1.pdf [file TPC-3-13-s1.pdf]

## Supplementary file

### Search Strategy

1. tobacco OR cigar\* OR "hand-rolling" OR hrt OR "roll-your-own" OR ryo
2. pack\* OR pouch\* OR box\* OR carton\* OR container\* OR bag\* OR tin\*
3. illicit\* OR illegal\* OR "black market" OR underground OR smuggl\* OR counterfeit\* OR bootleg\*
4. 1 and 2
5. 1 and 3
6. 4 and 5

© 2017 Haighton C.
